# Supplementary material
Source: Elsevier journal article supplement (https://www.sciencedirect.com/science/article/pii/S0300893222004262)
Supplement: mmc1 [file mmc1.pdf]

## **MATERIAL ADICIONAL**

### **ANEXO 1**

Código *shock* cardiogénico 2023: Resumen ejecutivo de las claves para su implementación

#### **Introducción**

El *shock* cardiogénico (SC) es un cuadro clínico de hipoperfusión tisular causado por una disfunción cardíaca grave que conlleva una elevada mortalidad. Es un proceso dependiente del tiempo que puede ser reversible si se aplican de urgencia las medidas adecuadas. El éxito en el abordaje del SC se fundamenta en 3 pasos:

1. La identificación precoz del SC y la caracterización precisa del estadio evolutivo.
2. El tratamiento urgente de la causa subyacente (como angioplastia primaria en el caso del SC debido a infarto agudo de miocardio [IAM]), la estabilización hemodinámica con fármacos y dispositivos de asistencia circulatoria mecánica (ACM)<sup>1,2</sup>.
3. El aporte de vías de salida a largo plazo de los pacientes «rescatados» inicialmente de un SC, que puede requerir dispositivos de asistencia ventricular de larga duración (DAV) o trasplante cardíaco (TxC).

En lo organizativo, se requiere un programa asistencial específico e integral de tipo «código» que permita acceder de urgencia a este complejo tratamiento a todos los pacientes con SC, siguiendo el principio de atención homogénea y equitativa. El código implica la organización de hospitales de distintos niveles de complejidad en una red que permita rápido acceso de pacientes en SC a centros de referencia con equipos multidisciplinarios con experiencia y dedicación específica a esta enfermedad<sup>3</sup>. El objetivo de este documento es describir los principales elementos y actores que forman parte de este modelo organizativo.

#### **Organización regional**

El modelo ideal para la atención al SC es la atención en red, conocido en inglés como *Hub and Spoke*, que permite dar una cobertura equitativa a una determinada área sanitaria<sup>3,4</sup>. Este modelo ha de tener en cuenta las distintas peculiaridades geográficas y los recursos

sanitarios, establece el tratamiento más adecuado en el centro inicial y, en caso necesario, deriva al paciente a otro centro mediante vías ágiles de traslado. Experiencias en áreas sanitarias de otros países han demostrado que los pacientes tratados según este modelo en red tienen resultados similares independientemente de dónde se produzca el primer contacto médico<sup>4</sup>.

Dentro de la organización en red en un área sanitaria debe existir una estructura jerarquizada de los distintos centros hospitalarios en función de su capacidad para atender a pacientes en SC. Los 3 niveles hospitalarios para el SC serían (figura 1):

- Nivel 3 o comunitario (detección del SC): centros generalmente con una unidad de cuidados intensivos (UCI) polivalente, sin cirugía cardíaca, angioplastia primaria ni acceso a dispositivos de ACM, que tienen capacidad para diagnóstico, monitorización hemodinámica invasiva, tratamiento farmacológico y soporte vital avanzado.
- Nivel 2 o avanzado (asistencia inicial del SC): centros con programa ininterrumpido de angioplastia primaria y cirugía cardíaca. Tienen capacidad de implante percutáneo o quirúrgico de dispositivos de ACM, como el Impella y/o el oxigenador extracorpóreo de membrana venoarterial (ECMO-VA).
- Nivel 1 o avanzado + opciones a largo plazo (tratamiento definitivo del SC): hospitales con equipos multidisciplinares de SC, amplia experiencia en implante percutáneo y quirúrgico de ACM de corta duración (diferentes modelos, configuraciones, formas de canulación y resolución de complicaciones), así como programas acreditados de ACM de media/larga duración y/o TxC para dar salida a los pacientes sin recuperación cardíaca.

### **Flujo de pacientes**

La figura 2 propone de forma esquemática el flujo de los pacientes entre los distintos niveles de hospital en función de la etiología del SC (IAM frente a no IAM) y el nivel asistencial donde se realiza el diagnóstico de SC (emergencias extrahospitalarias o centros hospitalarios de niveles 1, 2 y 3). El objetivo de este modelo organizativo es dar prioridad a que se atienda a los pacientes en los centros con más medios y experiencia siempre y cuando el traslado se pueda realizar en tiempos adecuados. De no ser así, se trasladaría al paciente al centro cercano de mayor jerarquía dentro de la red y después, si fuera necesario, al centro de referencia. En casos de SC de extrema gravedad (estadios D y E<sup>5</sup>)

diagnosticados en medios extrahospitalarios o centros comunitarios de nivel 3, los hospitales de niveles 1 y 2 pueden activar a un equipo de «ECMO móvil» para que un grupo de especialistas (formado por médico especialista en críticos, enfermera de críticos, perfusionista o enfermera experta en ECMO y médico que realiza la canulación) se desplace al lugar donde se encuentre el paciente, lo valoren y le implanten un ECMO-VA para trasladarlo al centro de referencia de una manera más segura.

Del traslado de pacientes entre hospitales o de dispositivos para la realización de implantes a distancia debe encargarse personal específicamente formado en SC y dispositivos de ACM en medios de transporte adaptados a las necesidades de estos traslados. Los aspectos más importantes para el buen funcionamiento del «código *shock*» deben ser minuciosamente protocolizados y conocidos por todos los profesionales implicados. Estos incluyen:

- Criterio de activación. Tendrá en cuenta la etiología del SC y los datos que definen el SC: parámetros clínicos, hemodinámicos y pruebas diagnósticas como determinación de lactato en sangre<sup>1</sup> y ecocardiografía.
- La estratificación del riesgo mediante escalas como la *Society for Cardiovascular Angiography and Intervention (SCAI)*, útiles para ayudar en la toma de decisiones sobre qué tratamiento aplicar de forma proporcionada, de menor a mayor complejidad<sup>5</sup>. Las probabilidades de supervivencia en el SC se reducen drásticamente cuando las medidas se instauran en estadios avanzados donde predomina el fracaso multiorgánico. Se deberá favorecer que se diagnostique y se trate a los pacientes en estadios más precoces (B y C)<sup>6</sup>. Se debe evitar la activación del código en vano, lo que evita un gran consumo de recursos en situaciones de daño orgánico irreversible sin posibilidad real de supervivencia.
- No todos los pacientes con SC serán susceptibles de las medidas que implica el acceso y las eventuales vías de salida del SC. La edad y las comorbilidades se deben tener en cuenta desde el primer momento.

### **Organización local y protocolización**

Dentro de la red de SC siempre ha de haber al menos un centro de referencia de nivel 1 que le dé soporte y coordine su funcionamiento. Los centros de nivel 1 y 2 deberán contar con equipos multidisciplinares de SC implicados en la toma de decisiones y la valoración diaria de los pacientes. Estos equipos deben incluir especialistas en cuidados críticos

(intensivista/cardiólogo/anestesiólogo y enfermería), cirujanos cardíacos/vasculares con enfermería especializada y perfusionistas, cardiólogos intervencionistas y cardiólogos de insuficiencia cardíaca (IC) avanzada. Además, para pacientes o situaciones concretas estos equipos se ampliarán para incluir, por ejemplo, neurólogos, especialistas en imagen cardíaca, rehabilitadores, expertos en nutrición o en cuidados paliativos.

El centro de referencia estará accesible para la red de manera permanente a través de una vía de comunicación directa (habitualmente busca telefónico específico o de IC avanzada). Por lo general, el especialista en críticos o el cardiólogo de IC avanzada realizará la labor de «primer contacto» y coordinación del proceso. A partir de ahí, deberá consensuar las decisiones con el resto del equipo y activar la vía clínica correspondiente. Además del abordaje inicial, las funciones del equipo de SC incluyen:

- Dirigir y supervisar diariamente a los pacientes en seguimiento para decidir cambios en el tratamiento y definir los objetivos que alcanzar en cada caso.
- Organizar reuniones multidisciplinarias con los hospitales de la red para compartir la actividad y revisar casos, especialmente aquellos con complicaciones o malos resultados.
- Entrenamiento y formación (incluye simulación) de los distintos profesionales implicados en la red. Es importante que existan protocolos de actuación, ya que se ha demostrado un beneficio clínico claro con su implementación<sup>7,8</sup>.

Como reflexión final, pensamos que la organización de la atención al SC es factible y puede mejorar la supervivencia de estos pacientes. El código SC es un reto organizativo en cada centro y área sanitaria, que conllevará cambios en el abordaje y flujo de pacientes. Por ello es clave que todos los actores implicados se supediten al bien común y colaboren en la protocolización del proceso. El apoyo institucional y la dotación de recursos materiales y personales es imprescindible para su implementación.

## **BIBLIOGRAFÍA**

1. Chioncel O, Parissis J, Mebazaa A, et al. Epidemiology, pathophysiology and contemporary management of cardiogenic shock — a position statement from the Heart

- Failure Association of the European Society of Cardiology. *Eur J Heart Fail.* 2020;22:1315-1341.
2. Van Diepen S, Katz JN, Albert NM, et al. American Heart Association Council on Clinical Cardiology; Council on Cardiovascular and Stroke Nursing; Council on Quality of Care and Outcomes Research; and Mission: Lifeline. Contemporary Management of Cardiogenic Shock: A Scientific Statement from the American Heart Association. *Circulation.* 2017;136:e232-e268.
  3. Crespo-Leiro MG, Metra M, Lund LH, et al. Advanced heart failure: a position statement of the Heart Failure Association of the European Society of Cardiology. *Eur J Heart Fail.* 2018;20:1505–1535.
  4. Tehrani BN, Sherwood MW, Rosner C, et al. A Standardized and Regionalized Network of Care for Cardiogenic Shock. *J Am Coll Cardiol HF.* 2022.  
<https://doi.org/10.1016/j.jchf.2022.04.004>.
  5. Naidu SS, Baran DA, Jentzer JC, et al. SCAI SHOCK Stage Classification Expert Consensus Update: A Review and Incorporation of Validation Studies. *J Am Coll Cardiol.* 2022;79:933-946.
  6. Basir MB, Kapur NK, Patel K, et al. National Cardiogenic Shock Initiative Investigators. Improved outcomes associated with the use of shock protocols: updates from the National Cardiogenic Shock Initiative. *Catheter Cardiovasc Interv.* 2019;93:1173-1183.
  7. Taleb I, Koliopoulou AG, Tandar A, et al. Shock Team Approach in Refractory Cardiogenic Shock Requiring Short-term Mechanical Circulatory Support: A Proof of Concept. *Circulation.* 2019;140:98-100.
  8. Tehrani BN, Truesdell AG, Sherwood MW, et al. Standardized Team-based Care for Cardiogenic Shock. *J Am Coll Cardiol.* 2019;73:1659-1669.

## **MATERIAL ADICIONAL**

### **ANEXO 2**

#### **Lecciones aprendidas del código infarto**

El abordaje de enfermedades dependientes del tiempo requiere el desarrollo de programas asistenciales específicos e integrales que aseguren su tratamiento urgente y adecuado. Estos programas, también llamados códigos, han demostrado su eficacia y su utilidad en varios contextos y los prototipos más paradigmáticos en el ámbito cardiovascular son el ictus<sup>1</sup>, la parada cardíaca<sup>2</sup> y el síndrome coronario agudo con elevación del segmento ST (SCACEST)<sup>3</sup>. Las lecciones aprendidas con este último pueden ser de mucha utilidad a la hora de organizar la asistencia al *shock* cardiogénico (SC).

La guía de práctica clínica de 2008<sup>4</sup> ya incluía la utilidad del código infarto (recomendación de tipo I), un reconocimiento que se ha mantenido en los últimos documentos<sup>5</sup>. La generalización del código infarto se impulsó en España en el seno de la iniciativa europea *Stent for Life*, que promueve la penetración de la angioplastia primaria como tratamiento (SCACEST). En el momento en que España se adhirió a esta iniciativa (2009) solamente existían 3 códigos infarto, creados entre 2000 y 2005 (Galicia, Murcia y Navarra). Tras la concienciación de los profesionales y de la clase política (facilitada por el análisis de diferencias en resultados entre comunidades autónomas y su publicación en medios de prensa generalistas) y un intenso trabajo de divulgación a los ciudadanos, se ha conseguido su generalización.

Fueron muchos los retos logísticos afrontados en el proceso. La situación de partida para cada región era diferente y el desarrollo de cada programa se condicionó necesariamente a las particularidades del territorio y sus instituciones sanitarias. Cabe destacar también notables diferencias regionales en el apoyo recibido de las administraciones durante el proceso de desarrollo de estas redes. En algunas comunidades el esfuerzo se sostuvo de manera prácticamente íntegra en los hombros de los profesionales, mientras que en otras regiones la administración ofreció apoyos a la hora de analizar la situación de partida y proporcionó los recursos necesarios para el cambio. La creación de estos códigos exigió un elevado nivel de organización entre los diferentes intervinientes involucrados en el proceso asistencial (hospitalarios y extrahospitalarios) y supuso cambios trascendentes en la cultura de trabajo, pues se desplazó el centro de decisión desde el cardiólogo al facultativo receptor del primer contacto médico, lo que obliga a agilizar las vías de comunicación entre

profesionales y prioriza el traslado de estos pacientes frente a otras urgencias extrahospitalarias. Se hizo necesaria una sectorización del territorio con base en isócronas, asegurando paralelamente el mantenimiento de un número suficiente de procedimientos por operador/centro. En las regiones donde la angioplastia primaria no estaba disponible de manera ininterrumpida, la introducción del código infarto supuso una transformación importante y en muchos casos exigió la capacitación e incorporación gradual de nuevos profesionales. Se publicaron protocolos consensuados, accesibles para todos los profesionales implicados y avalados por las administraciones, con sistemas de registro de tiempos y control de resultados. En la mayoría de las comunidades se han mantenido estos registros con intención de garantizar el mantenimiento de la calidad asistencial y detectar y resolver pronto los potenciales problemas. Lamentablemente, estos sistemas de monitorización son heterogéneos, de carácter local y voluntario y los datos recogidos no son de acceso público. En cualquier caso, es innegable que la generalización del código infarto ha permitido una notable mejora en la penetrancia de la angioplastia primaria, cuyo uso se ha incrementado paulatinamente como estrategia de reperfusión, con lo que se reducen la utilización de la fibrinólisis y el porcentaje de pacientes no reperfundidos, con un progresivo descenso en la mortalidad y una homogeneización de los resultados entre comunidades<sup>6</sup>, pese a que persisten diferencias regionales en organización, estructura y modo de evaluar sus resultados<sup>7-10</sup>. Iniciativas como SEC-RECALCAR han intentado evaluar el volumen real de actividad y los recursos destinados a estos programas<sup>11,12</sup>. Parece bastante evidente la necesidad de disponer de un registro nacional independiente y abierto con todos los datos de los programas existentes y sus resultados por sectores y centros<sup>13,14</sup>. Muchas de las lecciones aprendidas con el código infarto son extrapolables al desarrollo de códigos SC (tabla 1), aunque habrá que ajustar la logística a su menor prevalencia y a la mayor complejidad en la identificación, selección y abordaje de estos pacientes<sup>15-17</sup>.

## **BIBLIOGRAFÍA**

1. Jasne AS, Chojecka P, Maran I, et al. Stroke code presentations, interventions, and outcomes before and during the COVID-19 pandemic. *Stroke*. 2020;51:2664-2673.

2. Sinning C, Ahrens I, Cariou A, et al. The cardiac arrest centre for the treatment of sudden cardiac arrest due to presumed cardiac cause—aims, function and structure: Position paper of the Association for Acute CardioVascular Care of the European Society of Cardiology (AVCV), European Association of Percutaneous Coronary Interventions (EAPCI), European Heart Rhythm Association (EHRA), European Resuscitation Council (ERC), European Society for Emergency Medicine (EUSEM) and European Society of Intensive Care Medicine (ESICM). *Eur Heart J Acute Cardiovasc Care*. 2020;9:S193-S202.
3. Rodríguez-Leor O, Cid-Álvarez AB, Pérez de Prado A, et al. En representación de los investigadores del Grupo de Trabajo de Código Infarto de la Asociación de Cardiología Intervencionista de la Sociedad Española de Cardiología. Análisis de la atención al infarto con elevación del segmento ST en España. Resultados del Registro de Código Infarto de la ACI-SEC. *Rev Esp Cardiol*. 2022;75:669-680.
4. Van de Werf F, Bax J, Betriu A, et al. Management of acute myocardial infarction in patients presenting with persistent ST-segment elevation: the Task Force on the Management of ST-Segment Elevation Acute Myocardial Infarction of the European Society of Cardiology. *Eur Heart J*. 2008;29:2909-2945.
5. Jacobs AK, Ali MJ, Best PJ, et al. Systems of care for ST-segment-elevation myocardial infarction: a policy statement from the American Heart Association. *Circulation*. 2021;144:e310-e327.
6. Cid B, Rodríguez O, Moreno R, et al. Registro Español de Hemodinámica y Cardiología Intervencionista. XXVIII Informe Oficial de la Sección de Hemodinámica y Cardiología Intervencionista de la Sociedad Española de Cardiología (1990-2018). *Rev Esp Cardiol*. 2019;72:1043-1053.
7. Goicolea-Ruigómez J, Sabaté-Tenas M, Feldman M, Macaya C. The Current Status of Primary Percutaneous Coronary Intervention in Spain. *Rev Esp Cardiol*. 2011;11:15-20.
8. Cequier A, Ariza-Solé A, Elola FJ, et al. Impact on Mortality of Different Network Systems in the Treatment of ST-segment Elevation Acute Myocardial Infarction. The Spanish Experience. *Rev Esp Cardiol*. 2017;70:155-161.
9. Rodríguez-Leor O, Cid-Álvarez AB, Moreno R, et al. Encuesta sobre las necesidades de los programas de angioplastia primaria en España. *REC Interv Cardiol*. 2020;2:8-14.



10. Cequier A, Pérez de Prado A, Cid B, et al. Requisitos y sostenibilidad de los programas de ICP primaria en España en el IAMCEST. Documento de consenso de SEC, AECC y SEMES. *Rec Interv Cardiol.* 2019;2:108-119.
11. Rodríguez-Padial L, Bertomeu V, Elola FJ, et al. Quality Improvement Strategy of the Spanish Society of Cardiology: The RECALCAR Registry. *J Am Coll Cardiol.* 2016;68:1140-1142.
12. Íñiguez Romo A, Bertomeu Martínez V, Rodríguez Padial L, et al. The RECALCAR project. Healthcare in the cardiology units of the Spanish national health system. *Rev Esp Cardiol.* 2017;70:567-575.
13. de la Torre Hernández JM, Lozano González M, García Camarero T, et al. Interregional variability in the use of cardiovascular technologies (2011-2019). Correlation with economic indicators, admissions, and in-hospital mortality. *Rev Esp Cardiol.* 2022;75:805-815.
14. Alonso Martín J, Martín Martínez A, Ojeda García C, et al. Comisión de la coordinación y seguimiento del código infarto de la comunidad de Madrid. Actualización de abril de 2022. Gerencia Asistencial de Hospitales-Dirección General de Hospitales e Infraestructuras Sanitarias. SERMAS. Disponible en: [https://www.comunidad.madrid/sites/default/files/doc/sanidad/codigo\\_infarto\\_madrid\\_actualizacion\\_2022.pdf](https://www.comunidad.madrid/sites/default/files/doc/sanidad/codigo_infarto_madrid_actualizacion_2022.pdf).
15. Uribarri A, San Román JA. Redes asistenciales para el tratamiento del *shock* cardiogénico. Código *shock*. ¿Dónde y cómo implementarlo? *Rev Esp Cardiol.* 2020;73:524-526.
16. Hernández-Pérez FJ, Álvarez-Avelló JM, Forteza A, et al. Initial outcomes of a multidisciplinary network for the care of patients with cardiogenic shock. *Rev Esp Cardiol.* 2021;74:33-43.
17. Díaz Molina B, González Costello J, Barge-Caballero E. Código *shock* en España. El próximo salto de calidad en la asistencia cardiológica ya está aquí. *Rev Esp Cardiol.* 2021;74:5-7.

## **Tabla 1 del material adicional**

Lecciones aprendidas del código infarto aplicables al código *shock* cardiogénico

### **¿Qué debemos repetir?**

- Triple concienciación (clase política, profesionales, ciudadanos).
- Respaldo y cohesión de sociedades científicas.
- Reconocimiento de diferencias territoriales y flexibilidad/capacidad de adaptación a la realidad y singularidad de cada entorno sanitario.
- Coordinación y consenso entre actores/niveles asistenciales implicados.
- Generación de documentos de consenso antes del inicio de la actividad.
- Garantizar volumen de pacientes por centro y operador.
- Protocolo de organización asistencial claro y sencillo centrado en aspectos fundamentales, dejando detalles para subprocesos locales.
- Considerar en diseño e implantación el carácter multiprofesional (médicos, enfermeras, perfusionistas, técnicos de transporte y coordinación) y multidisciplinario (urgencias y emergencias, medicina intensiva, cardiología, cirugía cardíaca y vascular, anestesiología).

### **Potenciales puntos de mejora**

- Análisis completo y homogéneo de la situación de partida para cada comunidad autónoma.
- Apoyo institucional y respaldo pleno de la administración pública.
- Trabajo coordinado entre comunidades autónomas en contenidos y plazos.
- Registro nacional público y obligatorio de actividad que permita conocer el impacto de los programas desarrollados, obtener indicadores de calidad, detectar oportunidades de mejora y garantizar la equidad.
- Garantizar adecuación de recursos humanos, descansos y retribuciones.
- Plan estructurado de formación. Simulación como herramienta docente.
- Comisión de coordinación y seguimiento que permita una gestión eficaz de las incidencias y los cambios y gestione el proceso de mejora continua.
- Grupo de trabajo en investigación.

### **ANEXO 3**

Descripción de algunas experiencias locales de código *shock* cardiogénico en España

A continuación se describen algunas experiencias locales en España. Aunque muchos de los enfermos mencionados son pacientes con síndromes poscirugía cardíaca, creemos que esta información puede ser muy útil a la hora de diseñar, dimensionar y desarrollar el código *shock* cardiogénico (SC).

#### **Madrid (Hospital Universitario Puerta de Hierro)**

La unidad de SC empezó a funcionar en septiembre de 2014 y está asentada fundamentalmente en 4 (sub)especialidades: insuficiencia cardíaca (IC) avanzada, cardiología intervencionista, cirugía cardíaca y cuidados críticos. Sus principios básicos son 3: *a)* reconocimiento precoz y caracterización del cuadro de SC; *b)* revascularización universal en SC por infarto de miocardio y asistencia circulatoria mecánica (ACM) temprana en casos de refractariedad, y *c)* estrategia de salida del paciente favoreciendo la recuperación miocárdica<sup>1</sup>. Incluye una organización regional con centros de diferentes capacidades<sup>2</sup>. Los pacientes se transfieren de los hospitales de nivel 3 al 2 o directamente al de nivel 1. También profesionales del hospital de nivel 1 se desplazan en ocasiones a centros de nivel 2 o 3 para valorar, ayudar en el abordaje o implantar ACM (figura 1). Desde su creación, la unidad de SC ha atendido a más de 200 pacientes, el 48% trasladados desde otros centros (26 hospitales de 9 provincias y 5 comunidades autónomas). De los trasladados, el 40% viene de fuera de Madrid, el 70% proviene de hospitales de nivel 2 y en el 63% se traslada ACM. En los pacientes locales predomina el SC tras cardiotoromía (44%), mientras que en los hospitales de nivel 2 destaca la progresión de IC (48%) y en los de nivel 3 la proporción de IC e IAM es similar (el 46 y el 54% respectivamente). El 95% estaba en situación de la *Society for Cardiovascular Angiography and Intervention* (SCAI) D o E y la tasa de empleo de dispositivos de ACM es elevada (el 94% si se incluye el balón de contrapulsación). El oxigenador extracorpóreo de membrana (ECMO) venoarterial se empleó en el 50%. La supervivencia global al alta hospitalaria fue del 54%, mejor en los pacientes trasladados que en los locales (el 65 frente al 43%). Los principales destinos de los pacientes que sobreviven a la fase aguda son, a partes casi

iguales, la recuperación miocárdica y las terapias de reemplazo cardiaco (fundamentalmente el trasplante cardiaco).

### **Barcelona (Hospital Universitario de Bellvitge)**

La base de la asistencia al SC se empezó a formar en 2010, cuando los pacientes con SC profundo de causa médica tratados mediante ACM empezaron a ingresarse por sistema en la unidad de cuidados intensivos cardiológicos (UCIC). En el equipo también participan los servicios de Cirugía Cardiaca, Medicina Intensiva y la Unidad de IC avanzada. La actual unidad funcional de SC incluye varias reuniones semanales (diarias si es necesario), ha conllevado la adaptación de la estructura de la UCIC al mayor volumen y la complejidad de los casos y a establecer un protocolo hospitalario tanto para el circuito de los pacientes como para su asistencia; los pacientes con SC de causa médica ingresan en la UCIC y los pacientes con SC poscardiotomía, en el servicio de medicina intensiva/unidad de cuidados intensivos (UCI) posquirúrgica. Se han realizado traslados de buena parte del territorio catalán (incluso de otras comunidades) para valoración de tratamientos avanzados. Algunos casos han requerido traslado de los profesionales del centro para implante de ACM (principalmente ECMO venoarterial). Se ha regulado tanto el reconocimiento como la remuneración de estos procedimientos en otros centros, y hay un *pool* de profesionales del hospital (Medicina Intensiva, Anestesia y Reanimación, Cardiología, Cirugía Cardiaca) que participan activamente en la valoración, la selección, el implante de ECMO venoarterial y el traslado hasta el centro.

### **Valladolid (Hospital Clínico Universitario)**

El código SC se activa ante una llamada de un cardiólogo, cirujano cardiaco o intensivista desde cualquier hospital del área de influencia de nuestro centro al equipo de IC avanzada y trasplante cardiaco. En función de la situación clínica del paciente y las posibles contraindicaciones<sup>3</sup>, se decide el traslado de un equipo multidisciplinario de nuestro centro (en caso del Hospital de León, no es necesario pues ellos pueden colocar el ECMO y trasladar al paciente). Una vez en el centro, el equipo decide si el paciente se debe trasladar después de implantar el ECMO. El equipo debe tener experiencia en: *a)* diagnóstico y tratamiento de la IC aguda y el SC; *b)* obtención de una vía percutánea/abierta y en canulación, y *c)* protocolización del ECMO. Nuestro equipo incluye

un cardiólogo del área de IC avanzada y trasplante cardiaco que cumple los puntos a y c y un cirujano cardiaco o cardiólogo intervencionista que cumplen b y c. El equipo, la asistencia con ECMO y el material de implante se trasladan al hospital referidor en ambulancia convencional. El traslado del paciente a nuestro centro se realiza en UVI móvil con técnico y enfermero sanitario que es activado por el equipo al finalizar el implante. La activación de código SC para otros centros desde marzo de 2019 hasta junio de 2022 se ha realizado en 40 ocasiones, con traslado para valoración del caso en 17 e implante de ECMO en 16 (15 venoarterial y 1 venovenoso). Todos los pacientes estaban en situación SCAI D y E. Los 15 pacientes con ECMO venoarterial tenían una media de edad de 60 años y la indicación más frecuente fue SC secundario a infarto de miocardio (5-33%) (tabla 1). Se realizó canulación percutánea en 12 (80%) y abierta en 3. En 10 se hizo a pie de cama, 3 en sala de hemodinámica y 2 en sala de implante de marcapasos. Ninguno de los pacientes tuvo complicaciones relacionadas con el traslado ni mal funcionamiento de la asistencia durante este. El implante de ECMO consiguió la estabilización clínica en 12 (80%); el fallo multiorgánico fue la principal causa de muerte en las primeras 72 h del implante (n = 3). Se consiguió el destete de la terapia en 9 (60%), con una mediana de tiempo de asistencia de 7 [intervalo intercuartílico, 1-19] días. Se trasplantó a uno de los pacientes con éxito. La supervivencia hospitalaria fue del 53% (8/15); los 8 pacientes siguen vivos al momento de elaborarse este documento.

### **A Coruña (Complejo Hospitalario Universitario)**

El aumento progresivo del trasplante cardiaco en situación urgente<sup>4</sup>, junto con la elevada mortalidad de los pacientes trasplantados en situación de SC INTERMACS 1<sup>5</sup>, propició la puesta en marcha en 2012 de un protocolo de asistencia en red al SC refractario en paciente candidato a trasplante, con la participación del *Servicio Galego de Saúde*, programa de trasplante cardiaco, coordinación de trasplantes, urgencias extrahospitalarias 061 y representantes de los servicios de cardiología, cirugía cardiaca y medicina intensiva de todas las áreas sanitarias. Se organizó un modelo con diferentes niveles asistenciales<sup>6</sup> basado en el modelo *Hub and Spoke*<sup>7-9</sup>, adecuando la gravedad/necesidades del paciente a las capacidades/recursos de cada centro<sup>8-10</sup>. La figura 2 muestra el algoritmo que establece la organización asistencial y los criterios y vías de derivación<sup>11</sup>. Tras la estabilización inicial en el centro de nivel 3 más próximo (24 h de asistencia con ECMO/ACM de corta duración,

adecuada perfusión tisular y oxigenación, corrección de los trastornos de la coagulación y ausencia de disfunción multiorgánica), se traslada al paciente al centro trasplantador para evaluar su inclusión en lista. En pacientes tratados con maniobras de reanimación avanzada se debe descartar daño neurológico irreversible tras la estabilidad hemodinámica. De 2012 a 2021 se ha atendido a 120 pacientes en SC candidatos a trasplante, 94 varones (88,4%) con una media de edad de  $55,23 \pm 8,5$  años; 51 trasladados en situación de SC, 5 pacientes con síndrome coronario agudo en SC se trasladaron con soporte farmacológico a través de la red de atención al infarto; 19 pacientes, desde un hospital de nivel 2 y 27 desde un hospital de nivel 3; el 52,3% con IC *de novo* y peor situación clínica que los pacientes con IC crónica descompensada. El dispositivo más utilizado fue el ECMO venoarterial (69-50%), seguido del Impella (Abiomed, Estados Unidos) (46-33%) y Levitronix CentriMag (Levitronix LLC, Estados Unidos) (24-17%), aunque se precisó la escalada de la asistencia o la combinación de dispositivos en 19 pacientes. El fracaso multiorgánico durante la asistencia se asoció con el pronóstico. No se incluyó en lista de trasplante al 23% (27/120) (daño neurológico, fracaso multiorgánico irreversible, neoplasia sin diagnóstico previo). De los candidatos a trasplante, se trasplantó a 63, 20 recuperaron la función cardíaca, 9 fallecieron en lista y 1 recibió ACM de larga duración. La mortalidad hospitalaria total fue del 33%, el 13% en el grupo de pacientes candidatos a trasplante, con una mortalidad postrasplante del 13%.

### **Santander (Hospital Universitario Marqués de Valdecilla)**

La atención al SC se organiza con un centro de nivel 1 y 2 centros nivel 3, a 47 y 29 km de distancia e incluye un código ECMO en parada cardiorrespiratoria implementado en 2016 (36 pacientes incluidos, 28 paradas cardiorrespiratorias hospitalarias y 8 extrahospitalarias). La figura 3 muestra el flujo de los pacientes y sus 4 posibles vías de procedencia. Se incluye a pacientes del País Vasco o La Rioja cuando se considera el trasplante urgente como potencial salida terapéutica (8 pacientes derivados por esta vía en 2021). El facultativo de contacto es el cardiólogo de la UCIC que favorece el traslado para valoración presencial. El traslado se realiza directamente a la UCIC. Al ingreso se activa un equipo multidisciplinario (formado por cardiólogo de UCIC, cirujano cardíaco y/o cardiólogo intervencionista) y se decide la estrategia terapéutica inicial. Se puede alertar a este equipo antes de la llegada del paciente con el objetivo de minimizar el tiempo de hipoperfusión

orgánica (estadios SCAI D o E, incluyendo situación de PCR en el marco del correspondiente código). De esta forma, el soporte vital «espera al paciente» y no a la inversa. Posteriormente y con carácter multidisciplinario, se realizan reuniones diarias para fijar de manera dinámica objetivos y revisar el plan terapéutico. La estrategia institucional de selección de dispositivo para la ACM de corta duración incluye un uso preferente de los sistemas de implante periférico para pacientes con potencial de recuperación y/o en estadios más avanzados del *shock* y sistemas de asistencia ventricular de canulación central como puente a trasplante.

### **Bilbao (Hospital Universitario de Cruces)**

La logística se establece con base en: *a)* «Grupo ECMO»: multidisciplinario (médicos, enfermeras, técnicos) con 1 director y 2 coordinadores (médico y quirúrgico); *b)* «Equipo ECMO» de guardia localizada: intensivista (purgado y preparación del circuito) y cirujano cardiovascular (canulación), para toda la comunidad autónoma a través de un «Busca ECMO»; *c)* «Centro logístico de ECMO» al lado de las unidades de críticos, con un dispositivo siempre purgado, carros precintados y las listas de verificación preimplante; *d)* «Equipo ECMO de traslado»: 2 enfermeras (colaboran activamente durante el implante) y 1 técnico sanitario especializados en ECMO, que se incorporan al «equipo ECMO de guardia» para implantes y traslados desde otros centros, con una UVI móvil exclusiva para ECMO; en casos emergentes existe un vehículo, externo al sistema de salud, que permite dar respuesta inmediata (< 30 min), y *e)* «Profesional de referencia» en cada hospital para consultas y seguimiento de candidatos a ECMO o ya tratados. Se realizan reuniones interhospitalarias para mostrar resultados, comentar casos y plantear mejoras.

Existen 3 códigos ECMO (figura 4): I. «Emergente»: parada cardíaca presenciada con reanimación eficaz desde el primer minuto en paciente menor de 65 años sin contraindicaciones con tiempo parada-ECMO estimado < 40 min o SC de rápida evolución menor de 70 años, sin límite de tiempo, pero excluyendo *shock* evolucionado o no reversible. Implante donde se halle el enfermo, percutáneo ecoguiado (abierto si la anatomía es hostil o hay enfermedad vascular o anticoagulación/fibrinólisis); II. «Urgente»: menores de 70 años, valorando comorbilidades, causa y tiempo de evolución del cuadro (respiratorio < 10 días, cardiológico < 5 días salvo con opción a soporte definitivo o trasplante) con implante en la unidad de críticos, percutáneo ecoguiado (radiológico en

caso de cirugía previa o variación anatómica); incluye SC poscardiotomía, sin límite de edad, pero con corrección quirúrgica completa, con implante en el quirófano preferentemente de forma periférica, abierta con contraincisión; tras el implante todo enfermo se traslada al laboratorio de hemodinámica para diagnóstico-comprobación; III. «Programado»: indicado por el médico-cirujano que lleve a cabo la intervención/procedimiento, sin restricción de edad o enfermedad, el «equipo ECMO» solo valora contraindicaciones técnicas del implante o la asistencia, pero queda preestablecido si al acabar el procedimiento se continúa o finaliza la asistencia en caso de destete fallido; implante donde se realice el procedimiento por un cirujano cardiovascular o cardiólogo intervencionista vía percutánea ecoguiada y con control radiológico.

El coste medio de nuestro paciente en ECMO es de 69,742 ± 51,304 euros: el 58% por su hospitalización en UCI; de esto, lo asociado a la enfermería supone el 39% y a la terapia transfusional, el 12,3%. Este coste no incluye el del personal de guardia (aproximadamente 262.000 euros/año) ni los costes del paciente en su hospital de origen, así como los que se derivan después de dársele el alta de nuestro centro. El coste por traslado < 100 km se estima en 904 euros, sin incluir la guardia de la unidad de transporte; la ambulancia es exclusiva para ECMO, contratada a modo de *renting* (5.500 euros al mes), sin contar personal, material de electromedicina ni fungible.

### **Salamanca (Hospital Universitario)**

En 2013 se puso en marcha el programa de ECMO, que se hizo extensivo a un programa de ECMO móvil desde 2014<sup>12</sup>. En 2016 se incorporó el Impella CP (Abiomed, Estados Unidos). El programa contempla 3 posibilidades: *a)* atención local del SC, con un equipo encargado de estabilizar al paciente y decidir si es necesario el implante de AMC en el propio hospital. El médico encargado de coordinar la asistencia es un cardiólogo de la UCIC con experiencia en IC avanzada<sup>13-17</sup>. Junto con un cardiólogo intervencionista, una perfusionista, una enfermera de hemodinámica y una enfermera de la UCIC, son los encargados del implante de la asistencia y el cuidado posterior respectivamente; *b)* el traslado de cualquier paciente con ACM desde nuestro hospital a un centro de referencia para trasplante cardiaco (transporte secundario); en este caso el equipo está formado por cardiólogo de la UCIC, una perfusionista y una enfermera de la UCIC, y *c)* desplazar el equipo código SC a un centro sin programa de ACM, con el objetivo de implantar *in situ* la ACM y a continuación



trasladar al paciente a nuestro centro (transporte primario); en este caso, el equipo está formado por hemodinamista, un cardiólogo UCIC, perfusionista, enfermera de hemodinámica y enfermera de la UCIC. La remuneración al equipo de SC se paga como guardia de presencia física, sin que exista una guardia localizada. En el caso de SC poscardiotomía, el papel de los cardiólogos lo suplen intensivistas, así como su enfermería de UCI, y cirugía cardíaca tiene parte activa en el implante de la asistencia. Se han realizado 220 implantes de ACM de corta duración (no se contabilizan ECMO venovenosos): 174 ECMO venoarterial y 46 Impella CP (Abiomed, Estados Unidos); 165 pacientes han sido atendidos en la UCIC y 55 en la UCI. Un total de 162 pacientes (73,6%) eran varones; la media de edad fue  $63 \pm 11$  años, con importante experiencia en el paciente añoso<sup>18</sup>, con mediana de lactato al implante de 5,6 mmol/l y parada cardíaca previa al implante en un 51%. La indicación de implante fue principalmente el SC médico (42%), seguido de *shock* poscardiotomía (21%), parada cardíaca refractaria (16%), intervención coronaria percutánea de alto riesgo (15%) y tormenta arrítmica (6%). La mediana de tiempo en ACM fue de 4 días; las complicaciones más frecuentes fueron infecciones (44%), hemorragia (41%), complicaciones vasculares (25%), necesidad de terapia de sustitución renal continua (24%) y traqueostomía por ventilación mecánica prolongada (18%). La supervivencia hospitalaria fue del 41%; las principales causas de fallecimiento fueron el SC con fallo multiorgánico refractario y la encefalopatía anóxica. La movilidad del equipo ha sido notoria (figura 5), con 25 traslados en ACM, y destacan traslados no solo regionales, sino interregionales. Este último aspecto fortalece iniciativas como la que aquí se propone con carácter interterritorial y jerarquizado.

### **Santiago de Compostela (Hospital Clínico Universitario)**

La asistencia se coordina a través del equipo de la UCIC, formado por 4 cardiólogos acreditados en cuidados intensivos cardiológicos<sup>6</sup>. Los casos de SC de causa médica ingresan en la UCIC procedentes del área sanitaria del centro y traslados interhospitalarios desde centros sin posibilidad de ACM. De la canulación se ocupa cardiología intervencionista en sala de hemodinámica. Existe una colaboración estrecha con el centro de referencia de trasplante cardíaco. Tras la estabilización inicial en las primeras 24-48 h en la UCIC, si los pacientes con SC que precisaron ACM pueden ser candidatos a trasplante, se contacta con el centro de referencia para organizar el traslado y los cardiólogos de la UCIC

acompañan a los pacientes durante el transporte. El número anual de ingresos por SC de etiología médica oscila entre 25 y 30 pacientes, con una meda de edad de 71 años. Un 60% precisa intubación endotraqueal; un 37%, ACM y un 24%, terapia de sustitución renal. La mortalidad hospitalaria desde 2018 es del 39% (que aumenta al 50% en los casos de ECMO). En 7 pacientes se empleó reanimación cardiopulmonar con ECMO (3 sobrevivieron, 2 tras trasplante cardiaco). Los pacientes con SC poscardiotomía ingresan en la unidad de reanimación de anestesiología. Al año, una media de 5 pacientes posoperados de cirugía cardiaca precisan una ACM del tipo ECMO.

### **Valencia (Hospital Universitari i Politècnic la Fe)**

La ACM mediante ECMO venoarterial se instauró en 2006 para pacientes ingresados en el hospital y en 2008 se inició la técnica ECMO venovenoso. En 2010 se creó la unidad móvil de rescate de SC y/o insuficiencia respiratoria refractaria, coordinada por un «Equipo ECMO» con una guardia localizada de facultativos de medicina intensiva y de cirugía cardiaca que permite implantar el dispositivo en el hospital donde se encuentra el paciente las 24 h los 7 días de la semana. Es el médico intensivista quien activa el código SC tras la llamada del intensivista responsable del hospital de origen, que activa al cirujano cardiaco y organiza el traslado. El cirujano cardiaco realiza la canulación y el intensivista purga el circuito, colabora en la canulación y mantiene operativo el sistema. El traslado es mediante ambulancia o medios aéreos medicalizados, acompañados por un técnico sanitario y con una enfermera. Los pacientes con SC de causa médica ingresan en la unidad de medicina intensiva, mientras que los poscardiotomía lo hacen en la unidad de reanimación de anestesiología (figura 6). El hospital cuenta con SCM de corta (Impella CP y 5.0), media (Levitronix CentriMag) y larga duración (HeartWare, HeartWare Inc., Estados Unidos; HeartMate3, Abbott Labs, Estados Unidos). Desde 2010 a 2022 se han realizado 230 implantes de ACM de corta duración por SC médico, en el 94% de los casos ECMO venoarterial a pacientes con una media de edad de  $51 \pm 11$  años. La indicación principal ha sido el SC en el contexto del infarto agudo de miocardio (41%). La mediana de tiempo en asistencia circulatoria ha sido de 7 días y la supervivencia hospitalaria, del 43%, superior en el grupo de pacientes finalmente trasplantados (73%). El 56% ha sido trasladado por el equipo de ECMO móvil desde otros hospitales.

## BIBLIOGRAFÍA

1. Hernández-Pérez FJ, Álvarez-Avelló JM, Forteza A, et al. Initial outcomes of a multidisciplinary network for the care of patients with cardiogenic shock. *Rev Esp Cardiol.* 2021;74:33-43.
2. Rab T, Ratanapo S, Kern KB, et al. Cardiac shock care centers: JACC Review Topic of the Week. *J Am Coll Cardiol.* 2018;72:1972-1980.
3. Uribarri A, Stepanenko A, Tobar J, Veras-Burgos CM, Amat-Santos IJ, San Román JA. Initial experience of an interhospital rescue program through a mobile extracorporeal membrane oxygenation team within a cardiology department. *Rev Esp Cardiol.* 2021;74:802-803.
4. González-Vílchez F, Gómez-Bueno M, Almenar-Bonet L, et al. Spanish heart transplant registry. 33rd official report of the Heart failure Association of the Spanish Society of Cardiology. *Rev Esp Cardiol.* 2022. <https://doi.org/10.1016/j.rec.2022.06.011>.
5. Barge-Caballero E, Segovia-Cubero J, Almenar-Bonet L, et al. Preoperative INTERMACS profiles determine postoperative outcomes in critically ill patients undergoing emergency heart transplantation analysis of the Spanish national heart transplant registry. *Circ Heart Fail.* 2013 6:763–772.
6. Bonnefoy-Cudraz E, Bueno H, Casella G, et al. Acute Cardiovascular Care Association position paper on intensive cardiovascular care units: an update on their definition, structure, organisation and function. *Eur Heart J Acute Cardiovascular Care.* 2018;7:80–95.
7. Tchantchaleishvili V, Hallinan W, Massey HT. Call for organized statewide networks for management of acute myocardial infarction-related cardiogenic shock. *JAMA Surg.* 2015;150:1025–1026.
8. Crespo-Leiro MG, Metra M, Lund LH, et al. Advanced heart failure: a position statement of the Heart Failure Association of the European Society of Cardiology. *Eur J Heart Fail.* 2018;20:1505–1535.
9. Van Diepen S, Katz JN, Albert NM, et al. American Heart Association Council on Clinical Cardiology; Council on Cardiovascular and Stroke Nursing; Council on Quality of Care and Outcomes Research; and Mission: Lifeline. Contemporary Management of

Cardiogenic Shock: A Scientific Statement from the American Heart Association. *Circulation*. 2017;136:e232-e268.

10. Shaefi S, O'Gara B, Kociol RD, et al. Effect of cardiogenic shock hospital volume on mortality in patients with cardiogenic shock. *J Am Heart Assoc*. 2015;4:e001462.
11. McDonagh TA, Metra M, Adamo M, et al. ESC Scientific Document Group. 2021 ESC Guidelines for the diagnosis and treatment of acute and chronic heart failure. *Eur Heart J*. 2021;42:3599-3726.
12. Uribarri A, Cruz-González I, Dalmau MJ, Rubia-Martín MC, Ochoa M, Sánchez PL. Interhospital Transfer in Patients on ECMO Support. An Essential Tool for a Critical Care Network. *Rev Esp Cardiol*. 2017;70:1147-1149.
13. Rab T. "Shock Teams" and "Shock Docs". *J Am Coll Cardiol*. 2019;73:1670-1672.
14. Abrams D, Garan AR, Abdelbary A, et al. Position paper for the organization of ECMO programs for cardiac failure in adults. *Intensive Care Med*. 2018;44:717-729.
15. Moghaddam N, van Diepen S, So D, Lawler PR, Fordyce CB. Cardiogenic shock teams and centres: a contemporary review of multidisciplinary care for cardiogenic shock. *ESC Heart Fail*. 2021;8:988-998.
16. Taleb I, Koliopoulou AG, Tandar A, et al. Shock Team Approach in Refractory Cardiogenic Shock Requiring Short-Term Mechanical Circulatory Support: A Proof of Concept. *Circulation*. 2019;140:98-100.
17. Papolos AI, Kenigsberg BB, Berg DD, et al. Management and Outcomes of Cardiogenic Shock in Cardiac ICUs With Versus Without Shock Teams. Critical Care Cardiology Trials Network Investigators. *J Am Coll Cardiol*. 2021;78:1309-1317.
18. Alonso-Fernandez-Gatta M, Merchan-Gomez S, Toranzo-Nieto I, et al. Short-term mechanical circulatory support in elderly patients. *Artif Organs*. 2022;46:867-877.

**Tabla 1 del material adicional**

Características y evolución de los pacientes trasladados con asistencia de un oxigenador extracorpóreo de membrana (ECMO) al Hospital Clínico Universitario de Valladolid

|                | #1  | #2  | #3  | #4  | #5  | #6  | #7  | #8          | #9  | #10      | #11 | #12 | #13 | #14 | #15 | Mediana<br>o % |
|----------------|-----|-----|-----|-----|-----|-----|-----|-------------|-----|----------|-----|-----|-----|-----|-----|----------------|
| Edad           | 66  | 60  | 55  | 37  | 50  | 51  | 52  | 26          | 62  | 65       | 61  | 53  | 65  | 66  | 48  | 60             |
| Sexo           | V   | M   | V   | V   | V   | M   | V   | V           | V   | V        | V   | M   | V   | V   | V   | 80% V          |
| Causa          | IAM | TEP | IAM | CMP | CMP | CMP | IAM | Miocarditis | IAM | Tormenta | IAM | CMP | TEP | CMP | CMP |                |
| IS             | 87  | 210 | 15  | 107 | 103 | 210 | 107 | 80          | 510 | 100      | 310 | 205 | 280 | 402 | 157 | 192            |
| BCIA           | Sí  | No  | Sí  | No  | Sí  | No  | Sí  | No          | Sí  | Sí       | Sí  | Sí  | No  | Sí  | No  | 60%            |
| SOFA           | 9   | 11  | 9   | 8   | 10  | 8   | 7   | 11          | 15  | 9        | 10  | 14  | 16  | 17  | 11  | 10             |
| km             | 128 | 5   | 5   | 128 | 128 | 128 | 128 | 50          | 128 | 128      | 128 | 128 | 5   | 128 | 50  | 95             |
| TT<br>(min)    | 105 | 20  | 20  | 100 | 100 | 95  | 105 | 65          | 110 | 120      | 110 | 120 | 20  | 120 | 65  | 87             |
| ECMO<br>(días) | 19  | 2   | 10  | 8   | 6   | 4   | 10  | 8           | 1   | 8        | 7   | 1   | 3   | 5   | 5   | 7              |
| Vivo           | Sí  | No  | Sí  | Sí  | No  | Sí  | Sí  | Sí          | No  | No       | No  | No  | No  | Sí  | Sí  | 53%            |

BCIA: balón de contrapulsación intraaórtico; CMP: cardiomiopatía (incluye taquicardiomiopatía); IAM: infarto agudo de miocardio (incluye parada cardiaca en el seno de un infarto agudo de miocardio); IS: *inotropic score*; km: distancia de traslado; M: mujer;

SOFA: *sequential organ failure assesment*; TEP: tromboembolia pulmonar; TT: tiempo de traslado desde activación de equipo hasta su llegada; V: varón.

**Figura 1 del material adicional.** Organización en red para la atención al *shock* cardiogénico en el Hospital Universitario Puerta de Hierro de Madrid. AVL: asistencia ventricular de larga duración; AVT: asistencia ventricular temporal; CCV: cirugía cardiovascular; ECMO-VA: oxigenador extracorpóreo de membrana venoarterial; Hub: centro; ICP: intervención coronaria percutánea; SVA: soporte vasoactivo; TAH: *total artificial heart* (corazón artificial total); TxC: trasplante cardiaco; UCI: unidad de cuidados intensivos.

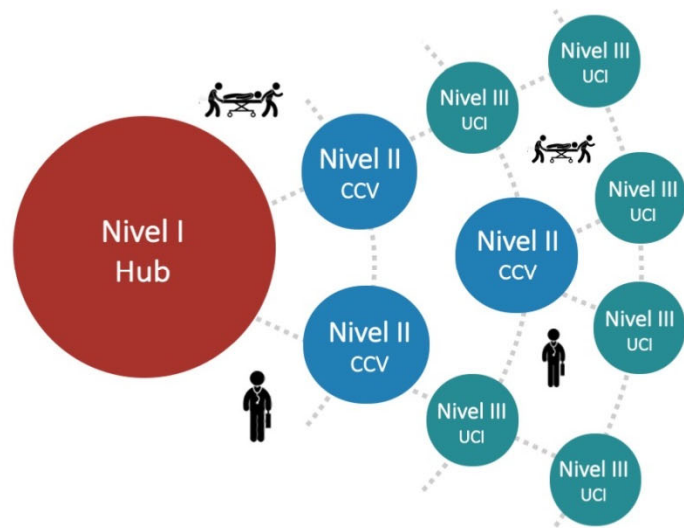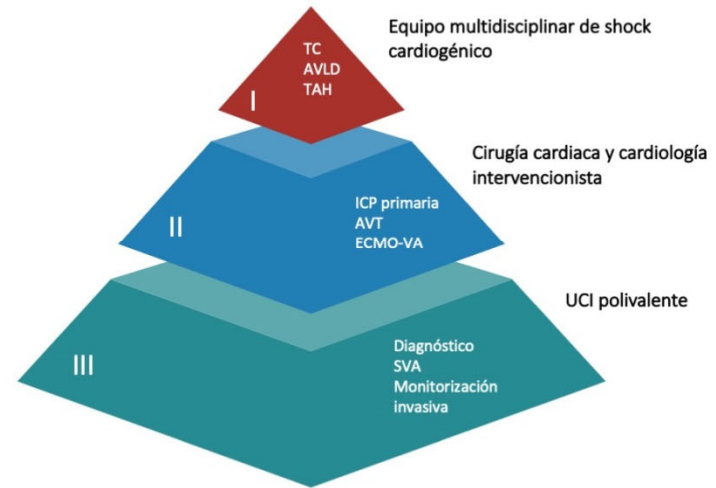



**Figura 2 del material adicional.** Algoritmo de abordaje del *shock* cardiogénico en el Complejo Hospitalario Universitario de la Coruña. ACM: asistencia circulatoria mecánica; BEM: biopsia endomiocárdica; BCIA: balón de contrapulsación intraaórtico; ECMO: oxigenador extracorpóreo de membrana; IC: insuficiencia cardíaca; ICP: intervención coronaria percutánea; IS: inmunosupresión.

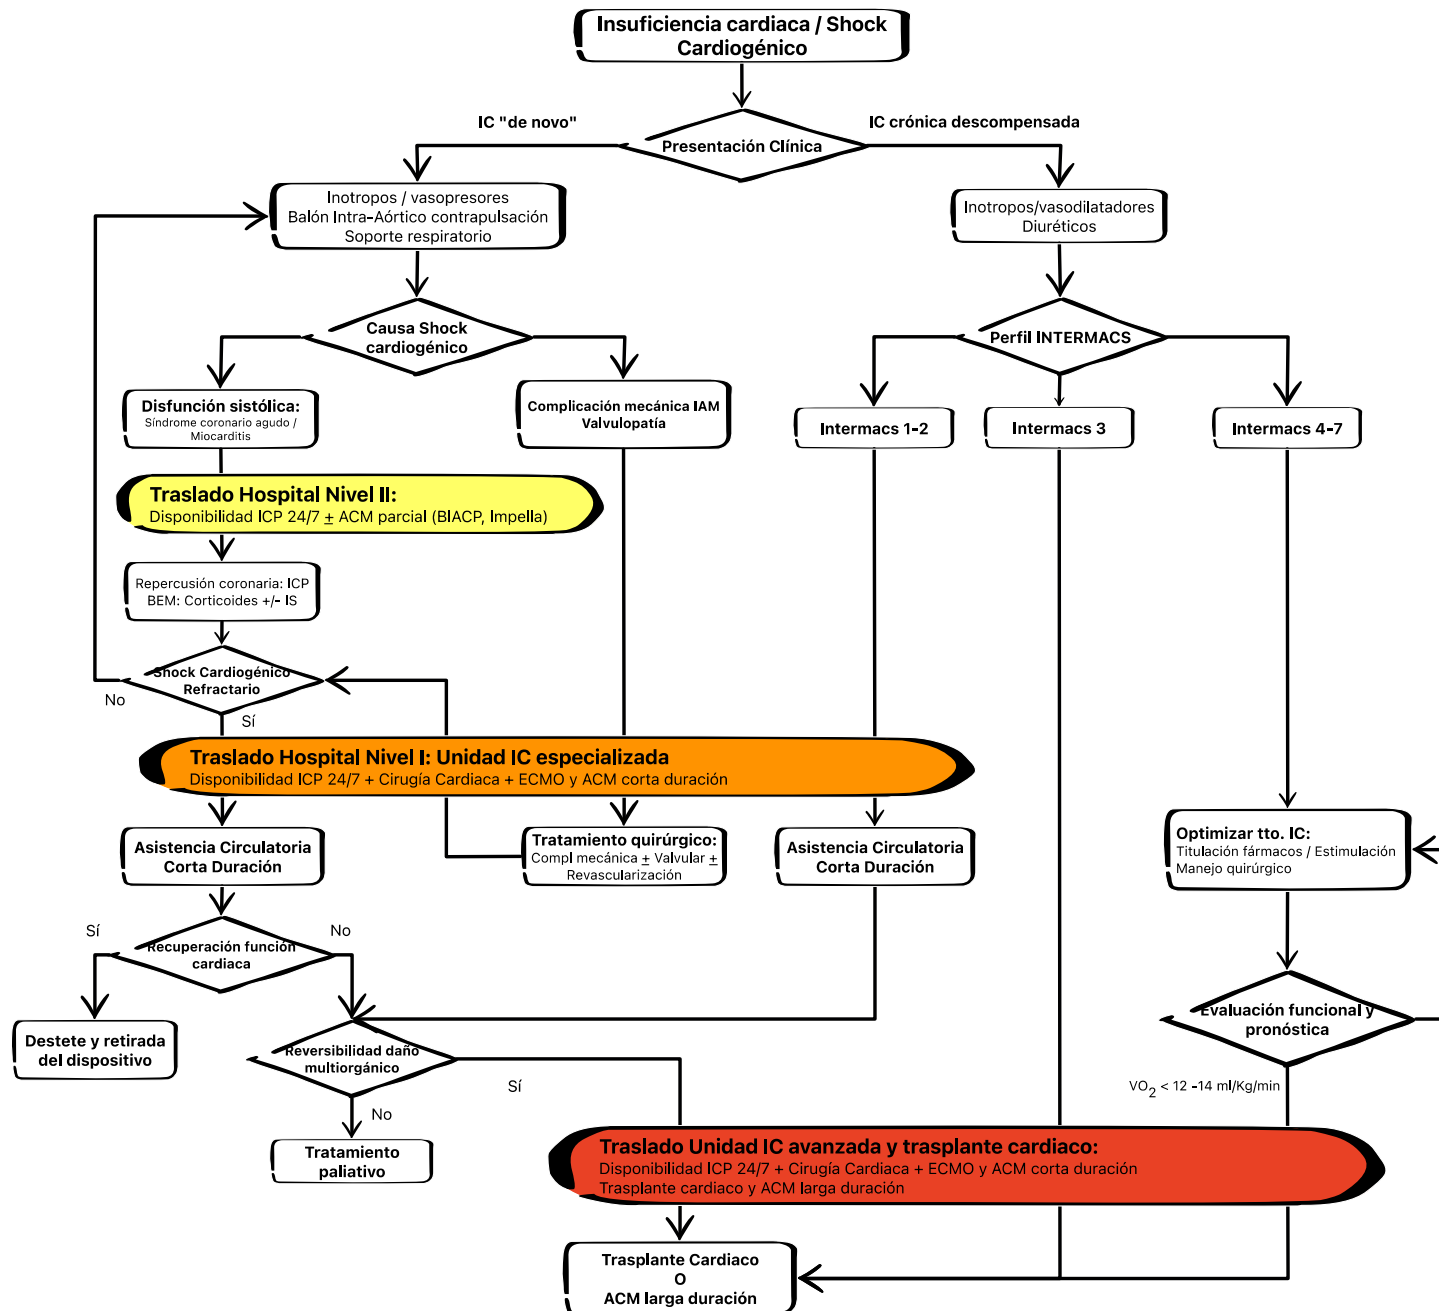

**Figura 3 del material adicional.** Flujo y procedencia de pacientes en el código *shock* de Santander. CCAA: comunidades autónomas; ECMO: oxigenador extracorpóreo de membrana; PCR: parada cardiorrespiratoria; SCACEST: síndrome coronario agudo con elevación del segmento ST; SCAI: *Society for Cardiovascular Angiography and Intervention*.

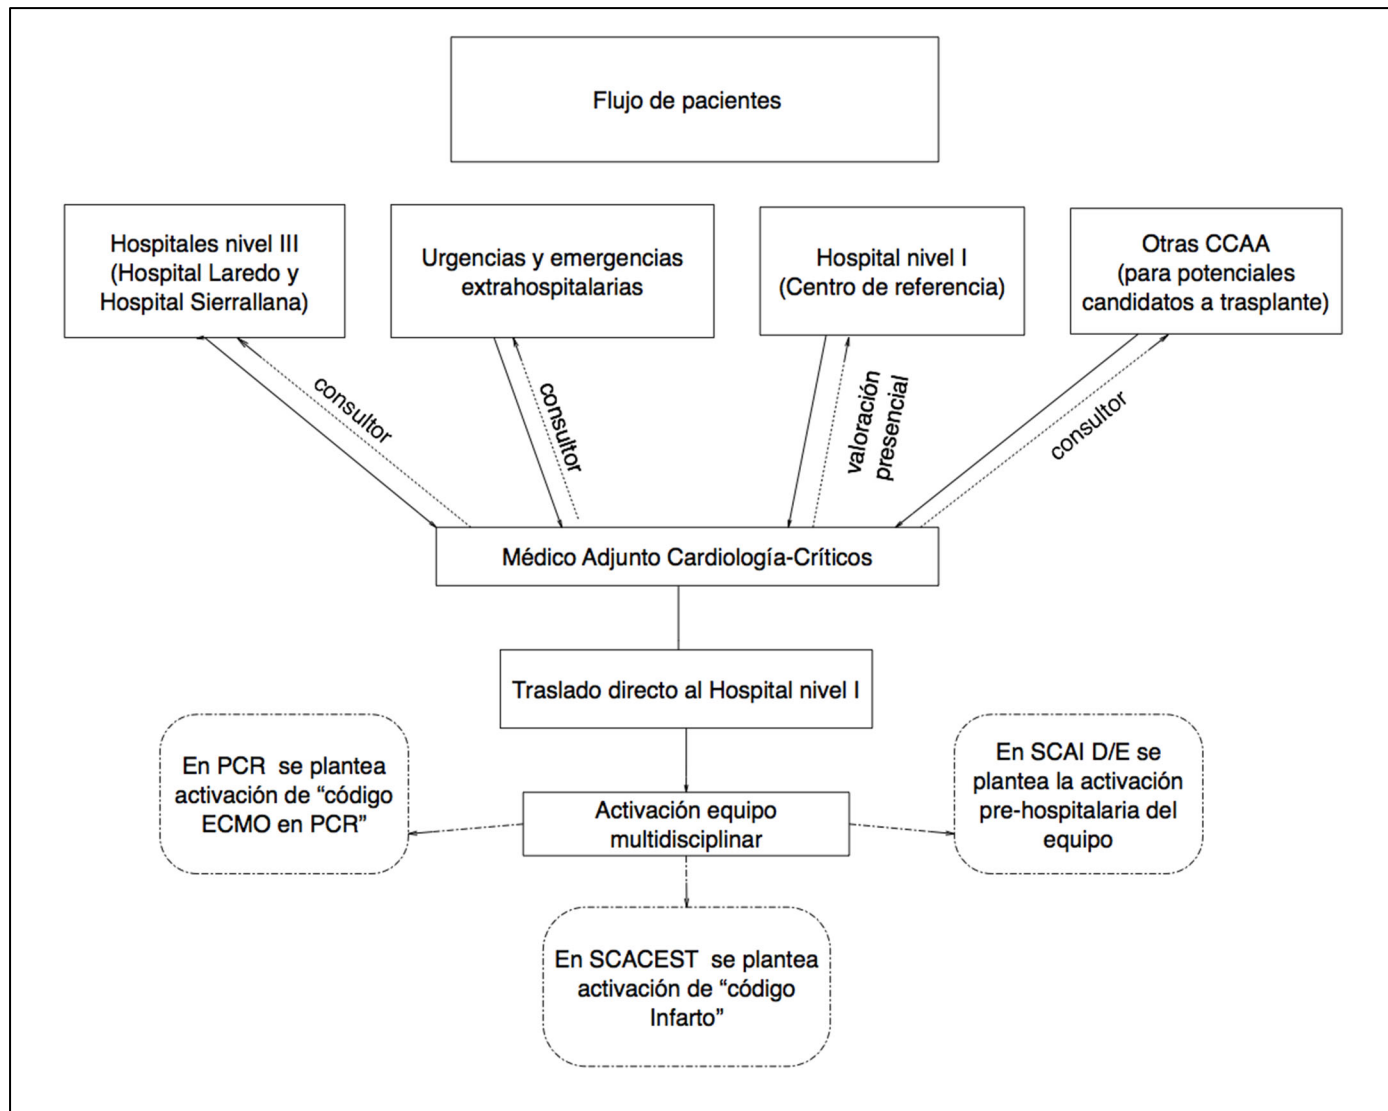

**Figura 4 del material adicional.** Situaciones más habituales de implante de ECMO por el equipo del Hospital Universitario de Cruces y flujo de pacientes. ECMO: oxigenador extracorpóreo de membrana; REA: Unidad de Reanimación; UCI: Unidad de Cuidados Intensivos; UCIP: Unidad de Cuidados Intensivos Pediátricos.

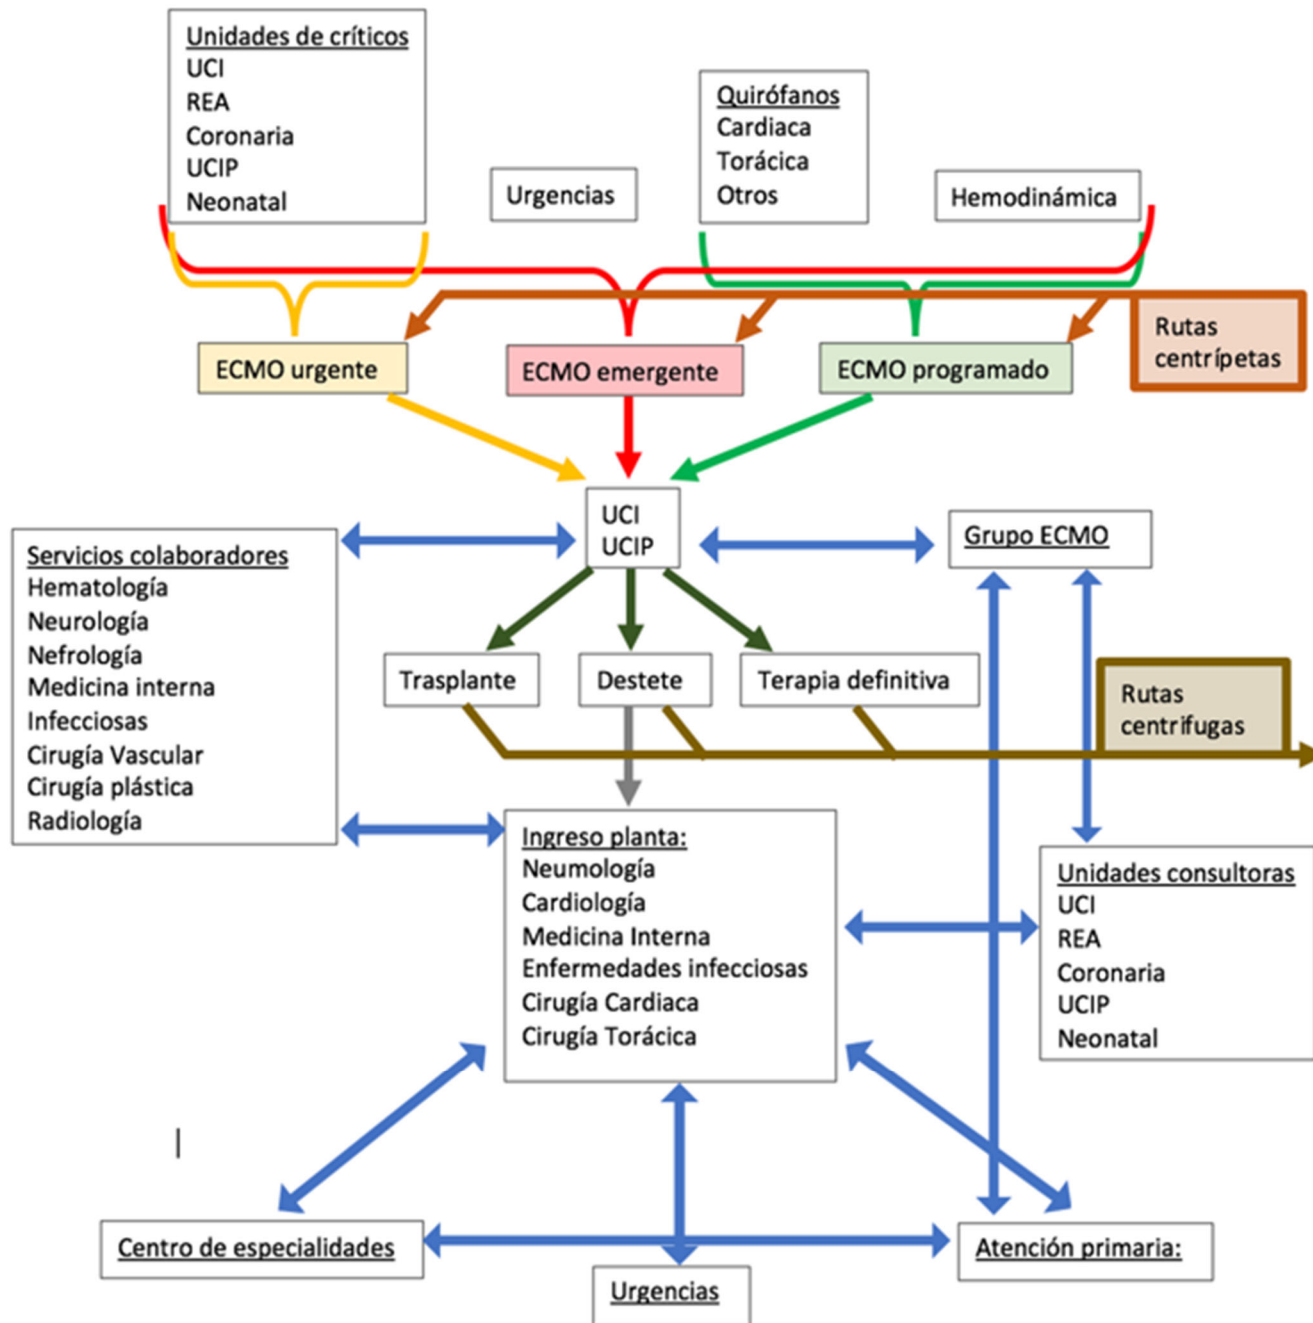

**Figura 5 del material adicional.** Implantes de ECMO-VA realizados por el equipo del Hospital Universitario de Salamanca y trasladados a otros centros de pacientes en ECMO. ECMO: oxigenador extracorpóreo de membrana; VA: venoarterial.

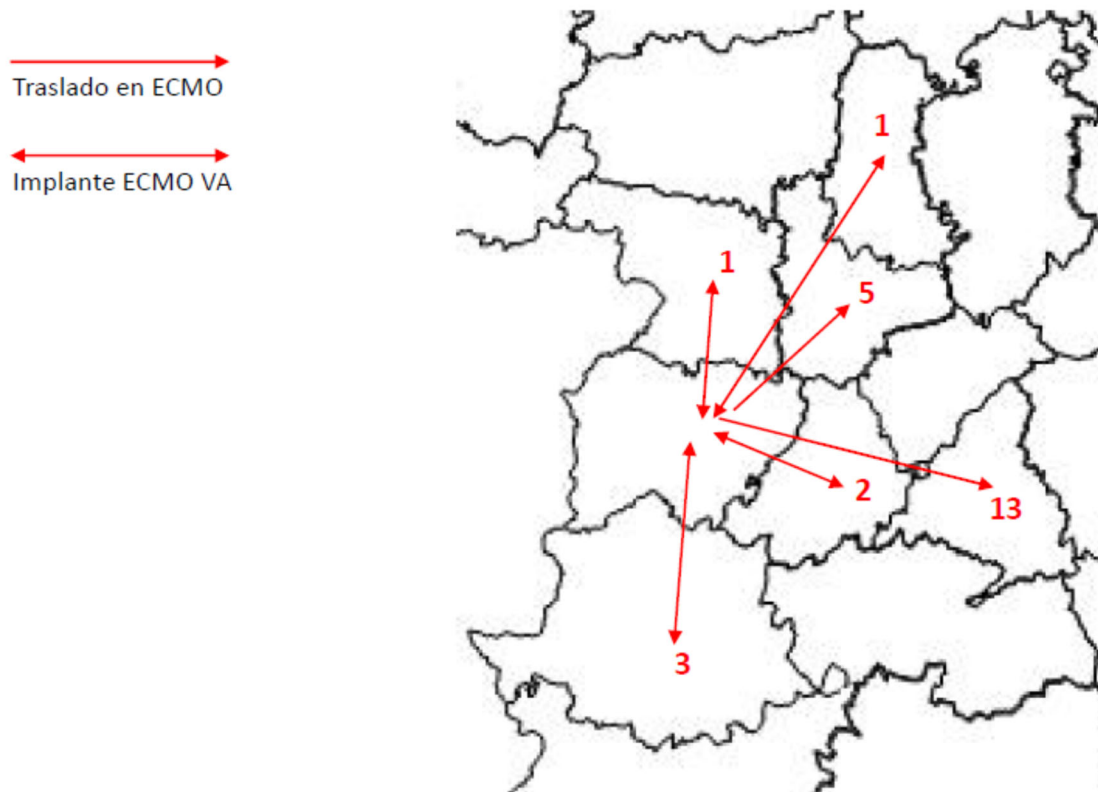

**Figura 6 del material adicional.** Flujo de pacientes con *shock* cardiogénico en el programa del Hospital Universitario la Fe de Valencia. ECMO: oxigenador extracorpóreo de membrana.

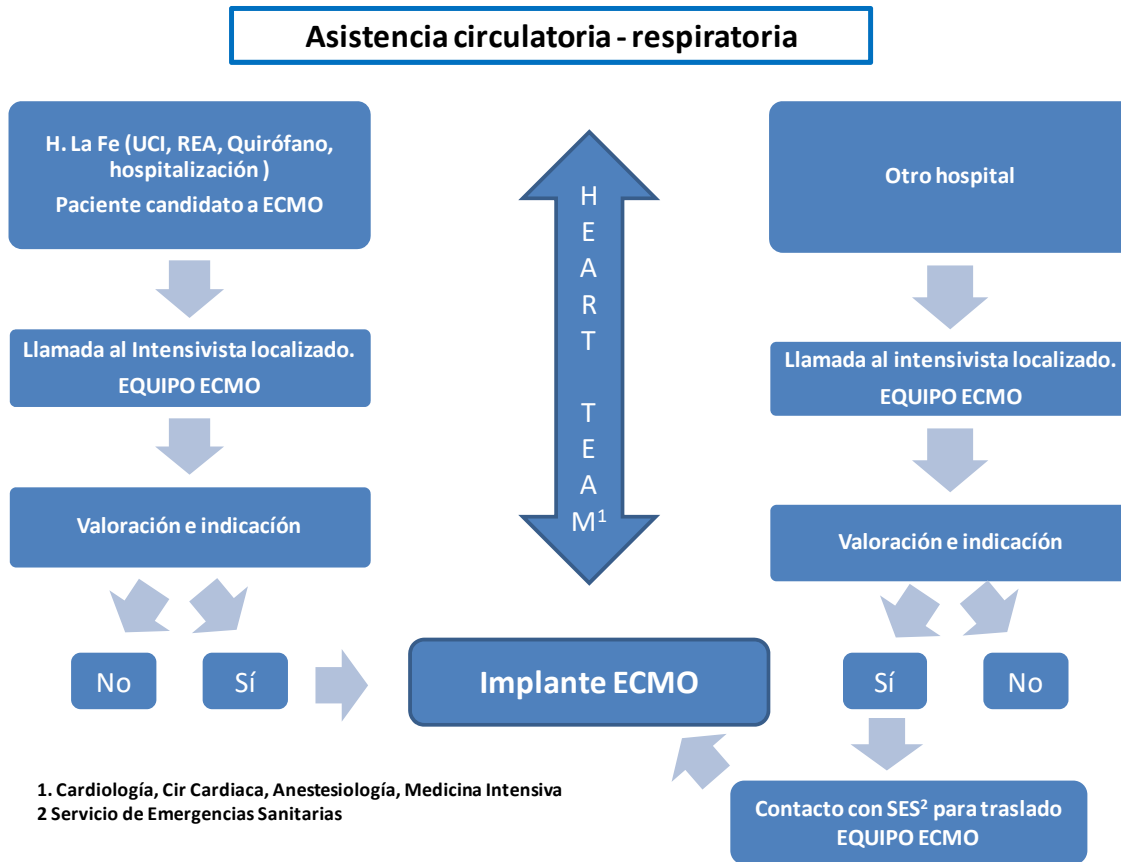



## ANEXO 4

### Códigos *shock* cardiogénico en otros países y sus resultados

Uno de los primeros estudios que utilizó lo que actualmente se considera el modelo más común de código *shock* cardiogénico (SC) (protocolo, activación telefónica y modelo hospitalario de coordinación en red) es el publicado por Tehrani et al.<sup>1</sup> en Virginia (Estados Unidos), que mostró un incremento de la supervivencia a los 30 días del 58 y el 77% en 2017 y 2018 comparada con la supervivencia del 47% de 2016, antes de que se implantara el código SC. El beneficio fue más pronunciado en el SC tras infarto agudo de miocardio (IAM). Otros estudios también comunicaron resultados favorables, como la del *Utah Cardiac Recovery shock team*<sup>2</sup> que comparó a 123 pacientes consecutivos con SC refractario y tratados con asistencia cardiocirculatoria mecánica (ACM) de corta duración tras implementar el código SC comparados con 121 pacientes de control tratados de la forma habitual, con un 13% de reducción del riesgo absoluto de muerte hospitalaria y una reducción en la mortalidad por todas las causas a los 30 días. Aunque en la *National Cardiogenic Shock Initiative*<sup>3</sup> no se especifica el uso como tal de código SC, sí que se fundamenta en un protocolo para SC en el seno del IAM que enfatiza en una revascularización precoz y un uso temprano de ACM (Impella), preferiblemente dentro de los 90 min tras la presentación y antes de una intervención coronaria percutánea siempre que fuera posible. De 171 pacientes de 35 centros de Estados Unidos, el 72% sobrevivía al alta comparado con el 50% de una cohorte histórica. Esto supone un resultado extraordinario teniendo en cuenta que el 20% de los pacientes tuvieron una parada cardiorrespiratoria extrahospitalaria y el 10% estaba en reanimación cardiopulmonar durante el implante del ACM. Más recientemente, la experiencia canadiense<sup>4</sup> mostró que, si se adaptaba un protocolo de código SC, se conseguía una mejoría a largo plazo en la supervivencia; este estudio destaca por la menor inclusión de pacientes con SC post-IAM. Incluyeron a 64 pacientes tratados en el código SC comparados con 36 pacientes asistidos del modo habitual. Destaca que no se observaron diferencias entre ambos grupos en la supervivencia a corto plazo (hospitalaria o a los 30 días), pero sí mejoró la supervivencia a largo plazo (mediana de seguimiento de 8 meses), del 67 frente al 42% del grupo control. De especial interés es un estudio más reciente multicéntrico<sup>5</sup> que incluyó a 1.242 pacientes con SC, que comparó la mortalidad en función de si el centro disponía de código SC o no. A pesar de que la gravedad del SC era equiparable en ambos grupos, la presencia de un

equipo de código SC se asocia con menor mortalidad. Además, los centros con código SC utilizaron más frecuentemente catéter de arteria pulmonar, más ACM avanzada y menos balón de contrapulsación intraaórtico.

La mayoría de estas experiencias están enfocadas en la identificación temprana de pacientes que se puedan beneficiar de la ACM<sup>6,7</sup>, tiempos puerta-ACM cortos, reducción del uso de inotrópicos/vasopresores tras el procedimiento y abordaje guiado por monitorización de catéter de arteria pulmonar<sup>8</sup>.

## **BIBLIOGRAFÍA**

1. Tehrani BN, Truesdell AG, Psotka MA, et al. A standardized and comprehensive approach to the management of cardiogenic shock. *JACC Heart Fail.* 2020;8:879-891.
2. Taleb I, Koliopoulou AG, Tandar A, et al. Shock Team Approach in Refractory Cardiogenic Shock Requiring Short-term Mechanical Circulatory Support: A Proof of Concept. *Circulation.* 2019;140:98-100.
3. Basir MB, Kapur NK, Patel K, et al. National Cardiogenic Shock Initiative Investigators. Improved outcomes associated with the use of shock protocols: updates from the National Cardiogenic Shock Initiative. *Catheter Cardiovasc Interv.* 2019;93:1173-1183.
4. Lee F, Hutson JH, Boodhwani M, et al. Multidisciplinary Code Shock Team in Cardiogenic Shock: A Canadian Centre Experience. *CJC Open.* 2020;2:249-257.
5. Papolos AI, Kenigsberg BB, Berg DD, et al. Management and Outcomes of Cardiogenic Shock in Cardiac ICUs With Versus Without Shock Teams. Critical Care Cardiology Trials Network Investigators. *J Am Coll Cardiol.* 2021;78:1309-1317.
6. Panoulas V, Ilsley C. Rapid Classification and Treatment Algorithm of Cardiogenic Shock Complicating Acute Coronary Syndromes: The SAVE ACS Classification. *J Interv Cardiol.* 2022. <https://doi.org/10.1155/2022/9948515>.
7. Tindale A, Monteagudo-Vela M, Panoulas V. Using base excess, albumin, lactate and renal function to predict 30-day mortality in patients requiring Impella monotherapy for left-sided mechanical circulatory support: The BALLAR score. *Cardiovasc Revasc Med.* 2022;41:129-135.

8. Monteagudo-Vela M, Simon A, Riesgo Gil F, et al. Clinical indications of IMPELLA short-term mechanical circulatory support in a tertiary centre. *Cardiovasc Revasc Med.* 2020;21:629-637.

## ANEXO 5

### Tipos de asistencia circulatoria mecánica de corta duración que se usan en nuestro medio y sus contraindicaciones

En nuestro medio se usan fundamentalmente 4 tipos de asistencia circulatoria mecánica (ACM) en pacientes con *shock* cardiogénico (SC):

1. Balón de contrapulsación: sigue siendo el más utilizado; se fabrica con una membrana de poliuretano montada sobre un catéter vascular 7 a 8 Fr, se coloca en la aorta torácica descendente justo distal a la arteria subclavia izquierda. El dispositivo está programado para inflarse y desinflarse durante el ciclo cardiaco, con lo que aumenta la presión arterial diastólica y reduce la sistólica. Diferentes registros han informado solo de una mejora mínima en la presión arterial media, el índice cardiaco, el lactato sérico y la necesidad de catecolaminas. Además, el estudio IABP-SHOCK II no mostró diferencias en la mortalidad a 30 días con respecto al tratamiento médico.
2. Bombas percutáneas microaxiales transvalvulares de flujo continuo: su máximo exponente es el Impella (Abiomed, Estados Unidos), con varios modelos que permiten descargar el ventrículo izquierdo, reducen el volumen diastólico y disminuyen el área de la curva presión/volumen y el trabajo cardiaco. Se puede colocar rápidamente a través de un abordaje percutáneo con una vaina de 14 Fr para el modelo CP que puede proporcionar hasta 3,5 l/min. Existen otros modelos que pueden suministrar hasta 5 y 5,5 l/min, pero que precisan de un abordaje quirúrgico. De la misma manera, existe un modelo (Impella RP) diseñado para asistir al lado derecho que puede aportar hasta 4 l/min.
3. Oxigenador extracorpóreo de membrana (ECMO) venoarterial: circuito compuesto de una bomba centrífuga, un intercambiador de calor y un oxigenador de membrana capaz de extraer sangre del territorio venoso y devolverla al territorio arterial oxigenada. Proporciona un apoyo circulatorio sustancial, pero aumenta la poscarga y el consumo de oxígeno.
4. CentriMag: ACM de implante quirúrgico que permite una asistencia más prolongada. Mediante un sistema de cánulas que posibilitan diversas configuraciones en función de las cavidades y grandes vasos a las que se conecte, aporta flujos que pueden

llegar hasta los 8 l a través de una bomba centrífuga paracorpórea. Puede darse asistencia biventricular implantando 2 bombas y respiratoria si se intercala una membrana de oxigenación en el circuito. Las contraindicaciones para el implante de ACM se muestran en la tabla 1.

### **Tabla1 del material adicional**

Contraindicaciones para el implante de asistencia circulatoria mecánica

|                                                                                                                                                                                                                                                                                                                                                                                                                                                                                                                                                                                                                                                                                                                                                                                                                                                     |
|-----------------------------------------------------------------------------------------------------------------------------------------------------------------------------------------------------------------------------------------------------------------------------------------------------------------------------------------------------------------------------------------------------------------------------------------------------------------------------------------------------------------------------------------------------------------------------------------------------------------------------------------------------------------------------------------------------------------------------------------------------------------------------------------------------------------------------------------------------|
| <p><i>Absolutas</i></p> <p>Daño neurológico irreversible</p> <p>Parada cardiorrespiratoria no presenciada o reanimación prolongada (&gt; 60 min)</p> <p>Neoplasia maligna activa</p> <p>Infección sistémica no controlada (que no sea la causa de la disfunción ventricular)</p> <p>Fallo multiorgánico establecido e irreversible</p> <p>Expectativa de vida &lt; 2 años por otra enfermedad previa</p> <p>Coagulopatía grave o hemorragia activa no controlada</p> <p>Hipertensión pulmonar grave crónica</p> <p>Negativa del paciente</p> <p>Enfermedad concomitante grave:</p> <ul style="list-style-type: none"><li>• Insuficiencia renal crónica con aclaramiento basal &lt; 30 ml/min o hemodiálisis</li><li>• Hepatopatía crónica grave</li><li>• Neumopatía crónica grave</li><li>• Enfermedad neurológica o neuromuscular grave</li></ul> |
| <p><i>Relativas</i></p> <p>Edad &gt; 75 años</p> <p>Enfermedad vascular periférica grave</p> <p>Obesidad mórbida</p> <p>Diabetes con afección grave de órganos diana</p> <p>Disección de aorta</p>                                                                                                                                                                                                                                                                                                                                                                                                                                                                                                                                                                                                                                                  |

Riesgo alto de trombogenicidad

Insuficiencia aórtica grave
